# Supplementary material
Source: Springer Nature journal article supplement (https://www.springermedizin.de/resource/supplementary/13045_2014_400_MOESM1_ESM.pdf/9661292)
Supplement: MOESM1 [file 9661292]

**Additional file1- Differential miRNA expression between cell types**

| mirName         | Log 2 fold change |                        |                       |               |                           |                 |
|-----------------|-------------------|------------------------|-----------------------|---------------|---------------------------|-----------------|
|                 | Promyelocyte/LSK  | Myelocyte/Promyelocyte | Granulocyte/Myelocyte | Myelocyte/LSK | Granulocyte/ Promyelocyte | Granulocyte/LSK |
| mmu-let-7a      | 2.064918689       | -0.007060282           | -2.102186035          | 2.057858407   | -2.109246317              | -0.044327628    |
| mmu-let-7c      | 0.898177232       | -0.915836484           | -1.066222192          | -0.017659252  | -1.982058677              | -1.083881444    |
| mmu-let-7d      | 1.903540823       | -0.699241404           | -1.354274845          | 1.204299419   | -2.053516249              | -0.149975426    |
| mmu-let-7e      | 0.010769921       | -0.100057696           | -0.695258242          | -0.089287775  | -0.795315938              | -0.784546017    |
| mmu-let-7g      | 1.447272259       | 1.273534627            | 0.231467829           | 2.720806886   | 1.505002456               | 2.952274715     |
| mmu-let-7i      | 2.49503173        | -0.508801846           | -1.006389297          | 1.986229884   | -1.515191143              | 0.979840587     |
| mmu-miR-101a    | 0.958522981       | -1.639985467           | -0.821762078          | -0.681462486  | -2.461747545              | -1.503224564    |
| mmu-miR-101b    | 0.964164368       | -2.062234756           | -0.933393165          | -1.098070388  | -2.995627921              | -2.031463553    |
| mmu-miR-103     | 0.424129751       | 2.589858321            | 0.458149026           | 3.013988072   | 3.048007347               | 3.472137099     |
| mmu-miR-106a    | 1.61087249        | -1.204060088           | -0.790990875          | 0.406812402   | -1.995050962              | -0.384178473    |
| mmu-miR-106b    | 0.149753189       | 2.059055065            | -0.177960125          | 2.208808254   | 1.88109494                | 2.030848129     |
| mmu-miR-106b*   | 6.554266291       | 3.09536081             | -1.280423957          | 9.649627101   | 1.814936853               | 8.369203144     |
| mmu-miR-10b     | -1.731222085      | 3.729589499            | 1.825758059           | 1.998367414   | 5.555347558               | 3.824125473     |
| mmu-miR-125a-5p | -10.7347052       | -1.048836463           | 1.453768402           | -11.78354167  | 0.40493194                | -10.32977326    |
| mmu-miR-125b-5p | -3.915293711      | -0.272889287           | -2.403230973          | -4.188182998  | -2.676120261              | -6.591413971    |
| mmu-miR-126-3p  | -5.196572423      | -0.816684829           | 0.266854713           | -6.013257253  | -0.549830117              | -5.74640254     |
| mmu-miR-126-5p  | -4.754834706      | -0.932247793           | -1.396841676          | -5.687082498  | -2.329089469              | -7.083924174    |
| mmu-miR-130a    | -1.791567833      | -3.045887553           | -1.911062673          | -4.837455386  | -4.956950226              | -6.748518059    |
| mmu-miR-130b    | 2.036711753       | -1.199273456           | -0.463106609          | 0.837438296   | -1.662380065              | 0.374331687     |
| mmu-miR-130b*   | 0.011966579       | -1.185255464           | 0.025642669           | -1.173288885  | -1.159612794              | -1.147646215    |
| mmu-miR-135a    | 12.28386434       | 8.348859959            | 1.087591084           | 20.63272429   | 9.436451043               | 21.72031538     |
| mmu-miR-135a*   | 0.584652862       | 0.60631237             | 0.188046242           | 1.190965231   | 0.794358612               | 1.379011473     |
| mmu-miR-135b    | 2.442549733       | 6.161369311            | 2.69196743            | 8.603919044   | 8.853336741               | 11.29588647     |
| mmu-miR-139-3p  | -0.4239588        | 14.92688846            | 3.315426198           | 14.50292966   | 18.24231466               | 17.81835586     |
| mmu-miR-139-5p  | 1.198709317       | 8.358946076            | 1.555313373           | 9.557655393   | 9.914259449               | 11.11296877     |
| mmu-miR-140     | 0.753039724       | 1.804850736            | 1.538902064           | 2.55789046    | 3.343752801               | 4.096792524     |
| mmu-miR-142-3p  | 3.574417159       | 3.174340232            | 0.048721072           | 6.748757391   | 3.223061303               | 6.797478462     |
| mmu-miR-142-5p  | 1.240250442       | 3.671808017            | -0.621920208          | 4.912058459   | 3.04988781                | 4.290138251     |
| mmu-miR-146a    | -3.900591913      | 5.025911911            | -3.324999462          | 1.125319998   | 1.70091245                | -2.199679464    |
| mmu-miR-148a    | 2.905485391       | 1.135918968            | 0.049404876           | 4.041404359   | 1.185323844               | 4.090809235     |
| mmu-miR-149     | 6.472209749       | 2.546607685            | -0.830822488          | 9.018817434   | 1.715785198               | 8.187994947     |
| mmu-miR-150     | -6.658888382      | 5.458589219            | -1.175289013          | -1.200299163  | 4.283300206               | -2.375588176    |
| mmu-miR-155     | -2.635040704      | -2.602782226           | -2.83112165           | -5.237822931  | -5.433903876              | -8.068944581    |
| mmu-miR-15a     | 0.059832895       | 4.528956979            | 0.221894566           | 4.588789874   | 4.750851544               | 4.81068444      |

|               |              |              |              |              |              |              |
|---------------|--------------|--------------|--------------|--------------|--------------|--------------|
| mmu-miR-15a*  | 1.506079448  | 1.368754406  | 0.748765946  | 2.874833853  | 2.117520351  | 3.623599799  |
| mmu-miR-15b   | 0.824155394  | 3.784806714  | 0.171805885  | 4.608962107  | 3.956612598  | 4.780767992  |
| mmu-miR-15b*  | 4.013932512  | 1.305502488  | 0.312840566  | 5.319435     | 1.618343054  | 5.632275566  |
| mmu-miR-16    | 0.717823791  | 3.416065128  | 0.552514049  | 4.133888919  | 3.968579178  | 4.686402969  |
| mmu-miR-16*   | 2.271940506  | 1.315759556  | 1.023997264  | 3.587700062  | 2.339756819  | 4.611697325  |
| mmu-miR-17    | 1.818578112  | -1.629557448 | -0.266854713 | 0.189020663  | -1.896412161 | -0.077834049 |
| mmu-miR-181a  | 0.938179797  | -0.402641194 | -1.376327541 | 0.535538602  | -1.778968735 | -0.840788938 |
| mmu-miR-185   | 3.637498126  | 3.029373674  | -1.323845544 | 6.6668718    | 1.70552813   | 5.343026256  |
| mmu-miR-186   | -1.399747845 | 0.990097655  | 0.80552172   | -0.409650191 | 1.795619375  | 0.39587153   |
| mmu-miR-18a   | 5.015706129  | -1.320135905 | -1.042972839 | 3.695570224  | -2.363108743 | 2.652597385  |
| mmu-miR-191   | 0.507041049  | -0.113733786 | 0.619355941  | 0.393307263  | 0.505622155  | 1.012663204  |
| mmu-miR-192   | 2.350065172  | 2.960480369  | 0.05453341   | 5.310545541  | 3.015013779  | 5.365078951  |
| mmu-miR-194   | -0.0377802   | 4.453738482  | 1.508301812  | 4.415958282  | 5.962040294  | 5.924260095  |
| mmu-miR-195   | 2.256725856  | 2.179233709  | 1.531893068  | 4.435959565  | 3.711126777  | 5.967852633  |
| mmu-miR-196b  | -6.382802309 | -3.361634289 | -4.038720426 | -9.744436597 | -7.400354714 | -13.78315702 |
| mmu-miR-19a   | 2.919674334  | -1.451084469 | -0.458490928 | 1.468589865  | -1.909575398 | 1.010098937  |
| mmu-miR-19b   | 1.958928989  | -0.716165565 | -0.371134901 | 1.242763423  | -1.087300467 | 0.871628522  |
| mmu-miR-200c  | 5.313673947  | 4.08397119   | 1.067589801  | 9.397645137  | 5.151560991  | 10.46523494  |
| mmu-miR-203   | -4.128127866 | -1.789225803 | -0.165822595 | -5.917353669 | -1.955048398 | -6.083176264 |
| mmu-miR-20a   | 3.367566293  | -1.127815884 | -1.611727245 | 2.239750409  | -2.73954313  | 0.628023163  |
| mmu-miR-20a*  | 0.644485757  | -2.417813105 | -0.682095005 | -1.773327348 | -3.09990811  | -2.455422353 |
| mmu-miR-20b   | 0.285830288  | -2.278316983 | -0.390281428 | -1.992486695 | -2.668598411 | -2.382768123 |
| mmu-miR-21    | 1.52608073   | 1.028219756  | -1.66848302  | 2.554300486  | -0.640263264 | 0.885817466  |
| mmu-miR-22    | 2.916426263  | 5.789550605  | 1.639421328  | 8.705976868  | 7.428971933  | 10.3453982   |
| mmu-miR-221   | 2.758809322  | -1.425612751 | -0.10752826  | 1.333196571  | -1.533141011 | 1.225668311  |
| mmu-miR-222   | -3.144304118 | -1.100634655 | -0.409086052 | -4.244938773 | -1.509720707 | -4.654024825 |
| mmu-miR-223   | 7.267303451  | 3.695228322  | 0.778340491  | 10.96253177  | 4.473568813  | 11.74087226  |
| mmu-miR-24    | -0.645853366 | 1.849810883  | 1.011004978  | 1.203957517  | 2.860815861  | 2.214962495  |
| mmu-miR-24-2* | -0.7419279   | 3.194512465  | 1.589845501  | 2.452584564  | 4.784357966  | 4.042430065  |
| mmu-miR-25    | 2.41023997   | 1.28772357   | -0.278308438 | 3.69796354   | 1.009415132  | 3.419655102  |
| mmu-miR-26a   | -0.876808341 | 3.333495733  | 0.506357244  | 2.456687391  | 3.839852977  | 2.963044636  |
| mmu-miR-26b   | -0.17112208  | 4.239194815  | 0.612688847  | 4.068072735  | 4.851883662  | 4.680761582  |
| mmu-miR-26b*  | -0.095732632 | 3.780874838  | 1.09921576   | 3.685142205  | 4.880090598  | 4.784357966  |
| mmu-miR-27a   | 2.932837571  | 2.466773508  | -0.111460136 | 5.39961108   | 2.355313372  | 5.288150943  |
| mmu-miR-27a*  | 2.152274716  | -0.123648952 | 0.670128426  | 2.028625764  | 0.546479475  | 2.69875419   |
| mmu-miR-27b   | 5.283757499  | -0.51102421  | -1.359061477 | 4.772733289  | -1.870085687 | 3.413671812  |
| mmu-miR-28    | -1.864222063 | 3.165621724  | 2.227322262  | 1.301399661  | 5.392943985  | 3.528721922  |

|                 |              |              |              |              |              |              |
|-----------------|--------------|--------------|--------------|--------------|--------------|--------------|
| mmu-miR-296-5p  | -2.14526572  | 6.697813954  | -1.355984356 | 4.552548235  | 5.341829598  | 3.196563878  |
| mmu-miR-297a*   | 3.513045704  | -2.168224456 | 4.054960783  | 1.344821248  | 1.886736327  | 5.399782031  |
| mmu-miR-29a     | -0.091971707 | 1.49816441   | 0.062226211  | 1.406192703  | 1.560390621  | 1.468418914  |
| mmu-miR-29c     | -1.305895675 | 2.428651406  | 0.942282624  | 1.122755731  | 3.37093403   | 2.065038355  |
| mmu-miR-301a    | 1.950552383  | 2.670205352  | 0.020685087  | 4.620757735  | 2.690890438  | 4.641442822  |
| mmu-miR-301b    | 3.19302519   | 2.232570461  | -0.240357288 | 5.425595651  | 1.992213174  | 5.185238364  |
| mmu-miR-30a     | -0.770476739 | 1.934773594  | -0.012308481 | 1.164296855  | 1.922465113  | 1.151988374  |
| mmu-miR-30a*    | -1.733444449 | -0.605731136 | 1.511207982  | -2.339175585 | 0.905476846  | -0.827967604 |
| mmu-miR-30b     | -0.194713336 | 2.427283797  | 1.179904693  | 2.232570461  | 3.607188491  | 3.412475154  |
| mmu-miR-30c     | -0.928435582 | 2.034609054  | 1.172724746  | 1.106173471  | 3.207333799  | 2.278898217  |
| mmu-miR-30d     | -0.128555249 | 1.304818683  | 0.607560313  | 1.176263434  | 1.912378996  | 1.783823747  |
| mmu-miR-30e     | -0.716456182 | 1.209940807  | 0.594055174  | 0.493484624  | 1.80399598   | 1.087539798  |
| mmu-miR-30e*    | 0.292326431  | 1.471325083  | 0.466696583  | 1.763651514  | 1.938021666  | 2.230348096  |
| mmu-miR-31      | -6.769664714 | 5.044032731  | -9.496677126 | -1.725631983 | -4.452644395 | -11.22230911 |
| mmu-miR-320     | -0.692523024 | -2.355928796 | -0.209586084 | -3.04845182  | -2.56551488  | -3.258037904 |
| mmu-miR-322     | -0.749278799 | 3.696083078  | -0.087356027 | 2.946804279  | 3.608727051  | 2.859448252  |
| mmu-miR-322*    | -3.788277022 | 4.524512249  | 1.69412569   | 0.736235228  | 6.218637939  | 2.430360918  |
| mmu-miR-328     | -0.495416372 | 0.925478128  | 1.219736306  | 0.430061756  | 2.145214434  | 1.649798062  |
| mmu-miR-33*     | -17.04040855 | 15.81754384  | 1.53514114   | -1.222864712 | 17.35268498  | 0.312276428  |
| mmu-miR-331-3p  | -2.689745066 | 0.784272495  | -0.064106673 | -1.905472571 | 0.720165822  | -1.969579244 |
| mmu-miR-340-3p  | 0.744321216  | 3.07108575   | 1.346240142  | 3.815406966  | 4.417325892  | 5.161647108  |
| mmu-miR-340-5p  | 2.508365918  | 3.111943069  | 0.924332755  | 5.620308987  | 4.036275825  | 6.544641742  |
| mmu-miR-342-3p  | -1.929183492 | 3.355548428  | -2.157574201 | 1.426364936  | 1.197974228  | -0.731209265 |
| mmu-miR-350     | -1.770540844 | 4.786751282  | 1.579417482  | 3.016210437  | 6.366168764  | 4.595627919  |
| mmu-miR-365     | 0.729106566  | 4.905391365  | 2.568027862  | 5.634497931  | 7.473419227  | 8.202525793  |
| mmu-miR-374     | 0.56926726   | -1.443391669 | -0.05299485  | -0.874124409 | -1.496386519 | -0.927119259 |
| mmu-miR-378     | 1.32316174   | -2.578507166 | -0.796632262 | -1.255345427 | -3.375139428 | -2.051977688 |
| mmu-miR-425     | 0.392332841  | 1.48602688   | 0.20138043   | 1.878359722  | 1.68740731   | 2.079740152  |
| mmu-miR-425*    | 0.011966579  | -0.963018996 | -0.598328952 | -0.951052417 | -1.561347948 | -1.549381369 |
| mmu-miR-466d-3p | -21.71421242 | 0.019949997  | 23.93999612  | -21.69426243 | 23.95994612  | 2.245733698  |
| mmu-miR-467a    | 2.907707755  | -2.033344015 | 5.091437479  | 0.87436374   | 3.058093464  | 5.965801219  |
| mmu-miR-467a*   | 3.342094575  | 0.411428082  | 1.31119516   | 3.753522657  | 1.722623243  | 5.064717818  |
| mmu-miR-467b*   | 2.99164476   | 0.402880526  | 1.907814601  | 3.394525286  | 2.310695127  | 5.302339887  |
| mmu-miR-467c    | 2.650426306  | -5.477496414 | 8.582772389  | -2.827070108 | 3.105275975  | 5.755702282  |
| mmu-miR-484     | 0.228903562  | 1.97802423   | 1.013911147  | 2.206927792  | 2.991935377  | 3.220838939  |
| mmu-miR-494     | 8.536615584  | -4.089373245 | -5.523943836 | 4.447242339  | -9.613317081 | -1.076701497 |
| mmu-miR-503     | -1.136312155 | 5.179596976  | -0.830480585 | 4.043284821  | 4.349116391  | 3.212804236  |

|                |              |              |              |              |              |              |
|----------------|--------------|--------------|--------------|--------------|--------------|--------------|
| mmu-miR-503*   | -3.487403034 | 2.517545993  | 0.865012713  | -0.969857041 | 3.382558707  | -0.104844327 |
| mmu-miR-532-3p | -2.801376153 | 3.377088271  | -0.386349552 | 0.575712118  | 2.990738719  | 0.189362566  |
| mmu-miR-532-5p | -1.680620551 | 3.230754104  | 0.268222322  | 1.550133554  | 3.498976426  | 1.818355875  |
| mmu-miR-574-3p | 1.108959975  | 1.548424042  | 1.810201506  | 2.657384017  | 3.358625549  | 4.467585523  |
| mmu-miR-652    | 1.969186057  | 3.586845306  | -0.251127209 | 5.556031363  | 3.335718097  | 5.304904154  |
| mmu-miR-674*   | -2.323225845 | 1.084975531  | -0.283778874 | -1.238250314 | 0.801196657  | -1.522029188 |
| mmu-miR-690    | 2.948906978  | 0.356723721  | -0.871850759 | 3.305630699  | -0.515127037 | 2.43377994   |
| mmu-miR-699    | -1.217172039 | -4.559830753 | 3.607068825  | -5.777002792 | -0.952761928 | -2.169933967 |
| mmu-miR-706    | 3.383122846  | 0.187482103  | -1.967647496 | 3.570604949  | -1.780165393 | 1.602957453  |
| mmu-miR-709    | 1.345385386  | -0.457003654 | 0.275231318  | 0.888381733  | -0.181772336 | 1.163613051  |
| mmu-miR-720    | 2.709575397  | 0.17038699   | -0.606876508 | 2.879962387  | -0.436489518 | 2.273085879  |
| mmu-miR-744    | 0.922965146  | 2.42318097   | 0.625168279  | 3.346146116  | 3.048349249  | 3.971314396  |
| mmu-miR-744*   | 9.54420154   | 5.449357858  | 2.008675767  | 14.9935594   | 7.458033625  | 17.00223517  |
| mmu-miR-7a*    | 0.567557749  | -0.371528089 | 0.584652862  | 0.19602966   | 0.213124773  | 0.780682521  |
| mmu-miR-801    | 12.40592344  | -9.471256693 | -0.328226168 | 2.934666749  | -9.799482861 | 2.606440581  |
| mmu-miR-805    | 2.574524005  | -7.021527012 | -2.579652539 | -4.447003008 | -9.601179551 | -7.026655546 |
| mmu-miR-872*   | -0.034190226 | -1.887864604 | -1.82746757  | -1.92205483  | -3.715332175 | -3.749522401 |
| mmu-miR-877*   | 1.058187489  | -0.137325042 | -1.424022906 | 0.920862447  | -1.561347948 | -0.503160458 |
| mmu-miR-92a    | 0.050259632  | -1.523738699 | -0.496271128 | -1.473479067 | -2.020009827 | -1.969750195 |
| mmu-miR-93     | 3.53373079   | 1.418159282  | -0.438318695 | 4.951890072  | 0.979840587  | 4.513571377  |
| mmu-miR-93*    | 0.135051392  | 0.859320041  | -0.17266064  | 0.994371433  | 0.6866594    | 0.821710792  |

---
